# Supplementary material for: TLC–Densitometry for Determination of Omeprazole in Simple and Combined Pharmaceutical Preparations
Source: MDPI journal article supplement (doi:10.3390/ph15081016), 2022-08-18
Supplement: s1 [file s1]

# TLC–Densitometry for Determination of Omeprazole in Simple and Combined Pharmaceutical Preparations

Wioletta Parys\* and Alina Pyka-Pająk\*

Department of Analytical Chemistry, Faculty of Pharmaceutical Sciences  
in Sosnowiec, Medical University of Silesia in Katowice, Jagiellońska 4,  
41-200 Sosnowiec, Poland

\* Correspondence: wparys@sum.edu.pl (W.P.); apyka@sum.edu.pl  
(A.P.-P.); Tel.: +48-32-364-15-34 (W.P.); +48-32-364-15-30 (A.P.-P.)

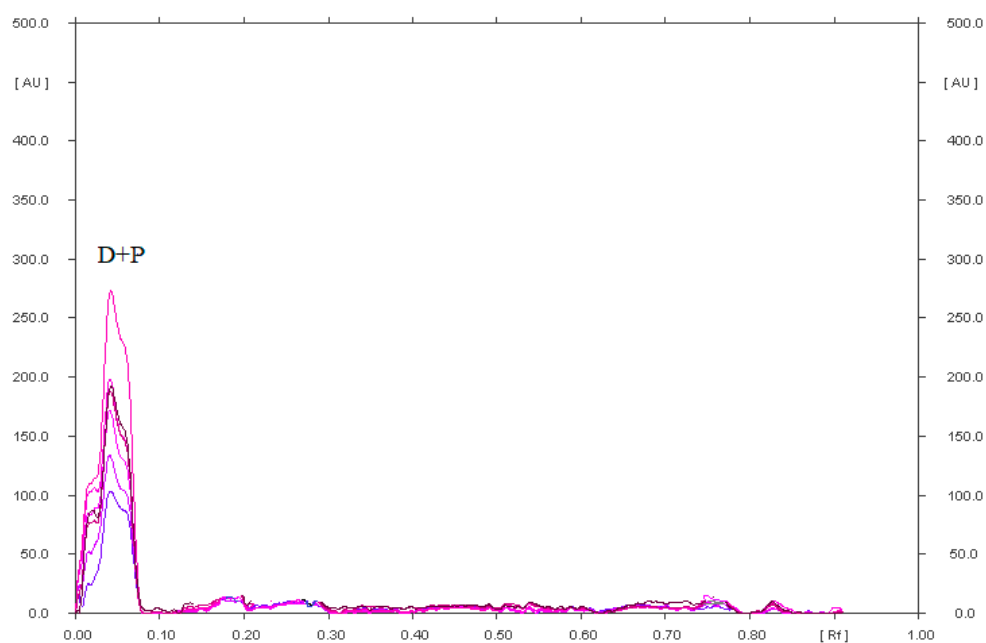

**Figure S1.** Densitogram of diclofenac sodium, the solution of which after UV irradiation was separated on silica gel using the mobile phase: chloroform+methanol+ammonia (36:4:0.60, v/v/v).

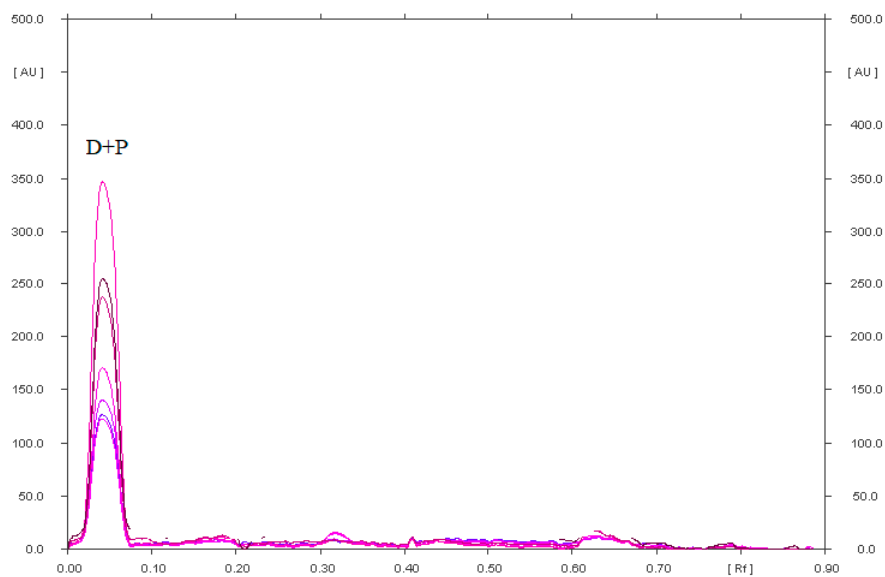

**Figure S2.** Densitogram of diclofenac sodium in alkaline solution, which after heating was separated on silica gel using the mobile phase: chloroform+methanol+ammonia (36:4:0.60, v/v/v).

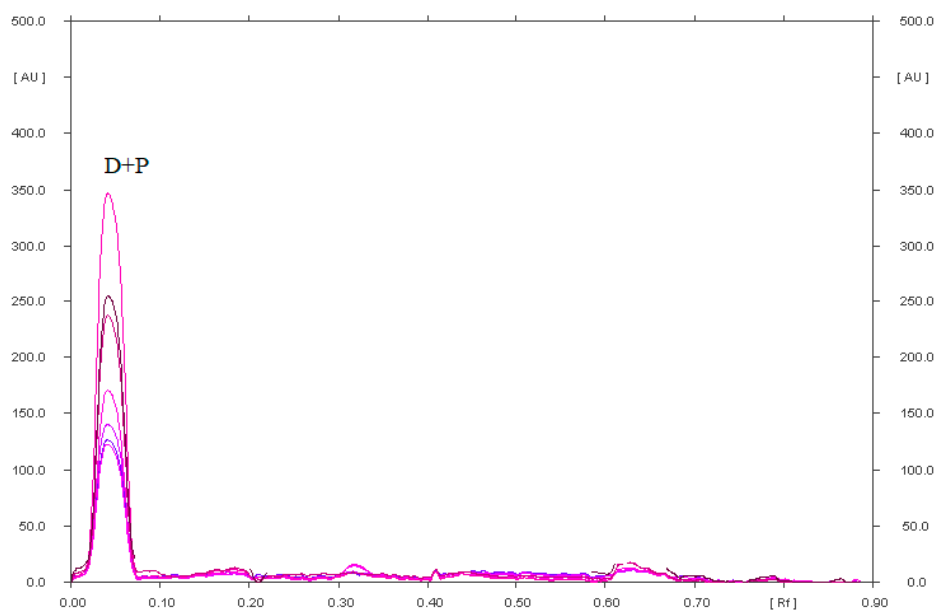

**Figure S3.** Densitogram of diclofenac sodium in a solution with the addition of hydrogen peroxide, which after heating was separated on silica gel using the mobile phase: chloroform+methanol+ammonia (36:4:0.6, v/v/v).

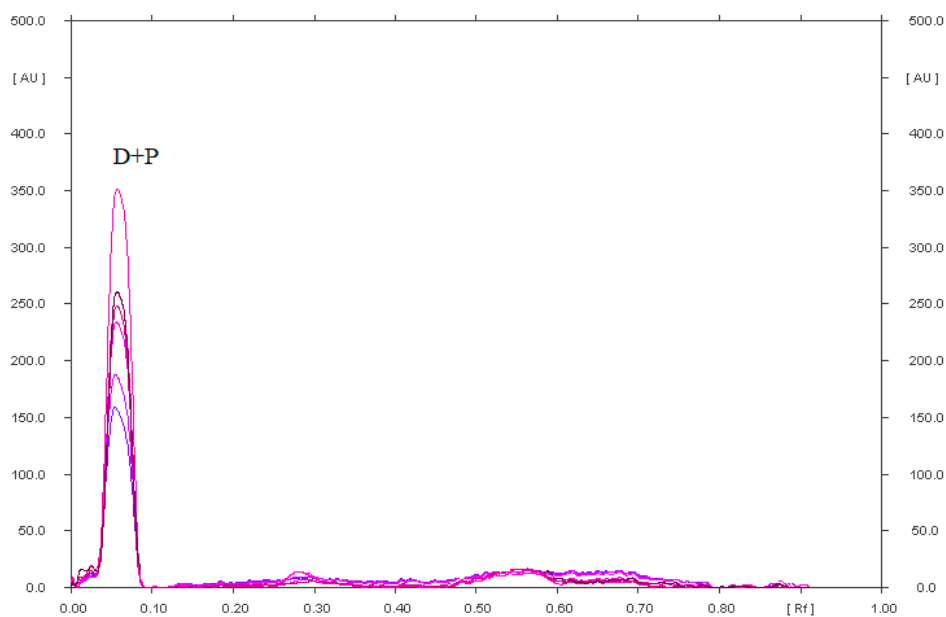

**Figure S4.** Densitogram of diclofenac sodium in acidic solution, which after heating was separated on silica gel using the mobile phase: chloroform+methanol+ammonia (36:4:0.60, v/v/v).

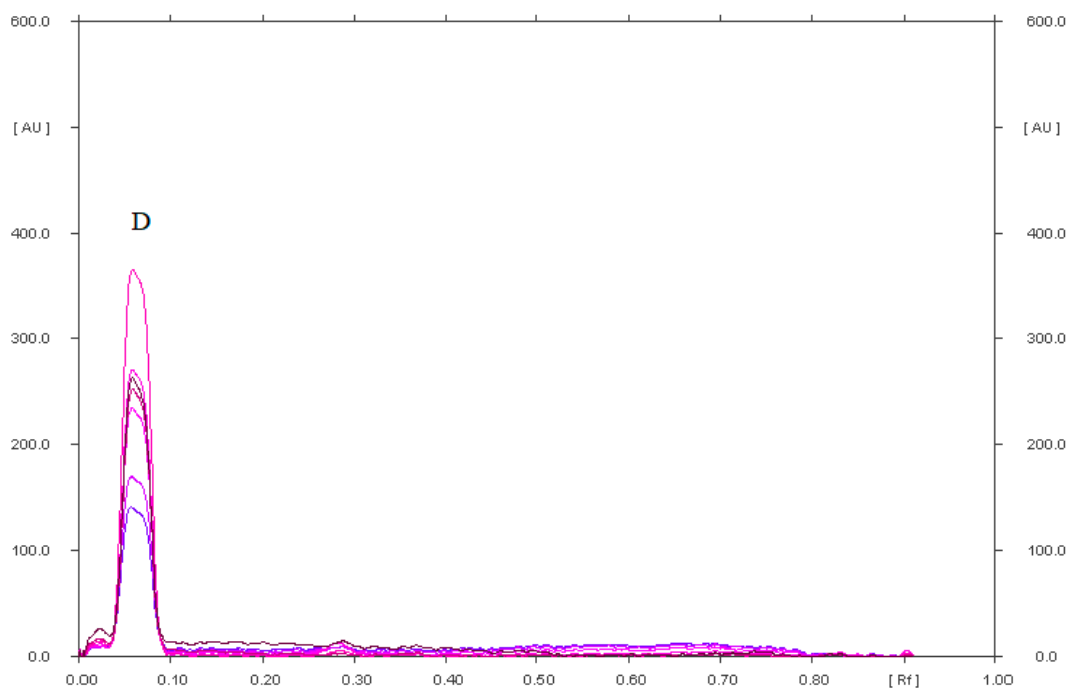

**Figure S5.** Densitogram of a standard solution of diclofenac sodium that was separated on silica gel using the mobile phase: chloroform+methanol+ammonia (36:4:0.60, v/v/v).

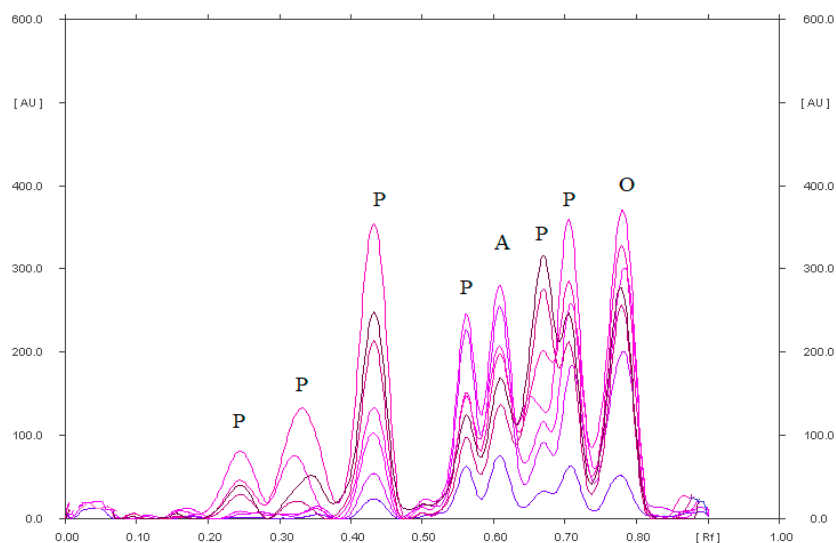

**Figure S6.** Densitogram of omeprazole in alkaline solution, which after heating was separated on silica gel using the mobile phase: chloroform+methanol+ammonia (36:4:0.60, v/v/v); where: O-omeprazole, A - omeprazole related compound A, P - unidentified omeprazole degradation products.

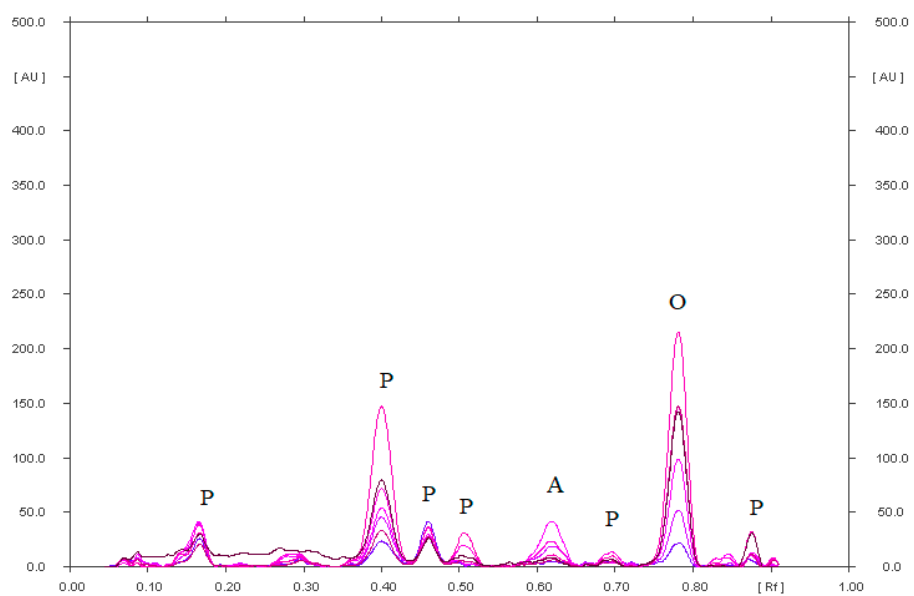

**Figure S7.** Densitogram of omeprazole in solution with the addition of hydrogen peroxide, which after heating was separated on silica gel using the mobile phase: chloroform+methanol+ammonia 36:4:0.60, v/v/v); where: O-omeprazole, A - omeprazole related compound A, P - unidentified omeprazole degradation products.

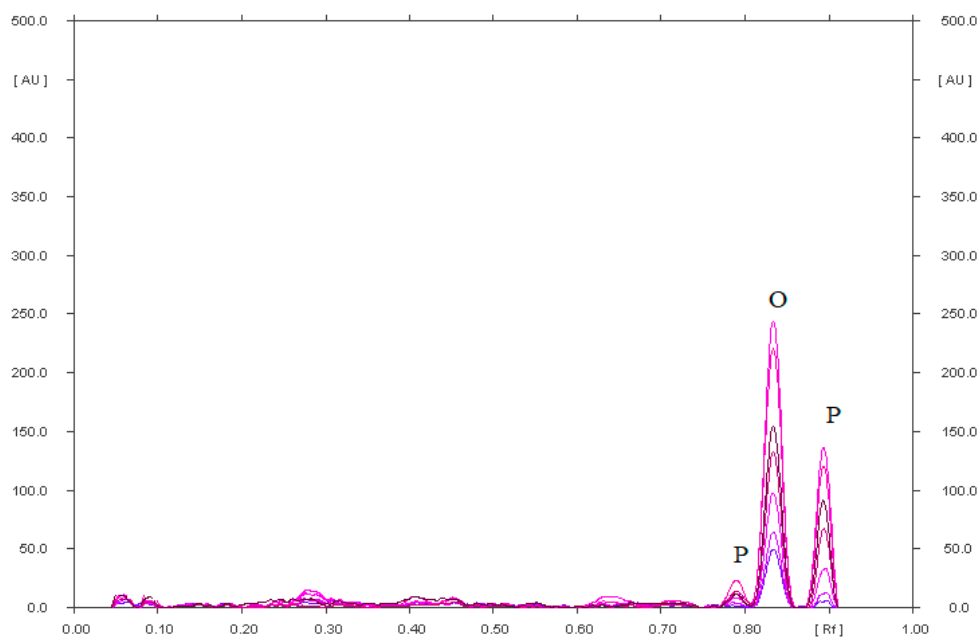

**Figure S8.** Densitogram of omeprazole in a solution with the addition of physiological saline, which after heating was separated on silica gel using the mobile phase: chloroform+methanol+ammonia 36:4:0.60, v/v/v; where: O-omeprazole, and P1, P2 – unidentified omeprazole degradation products.

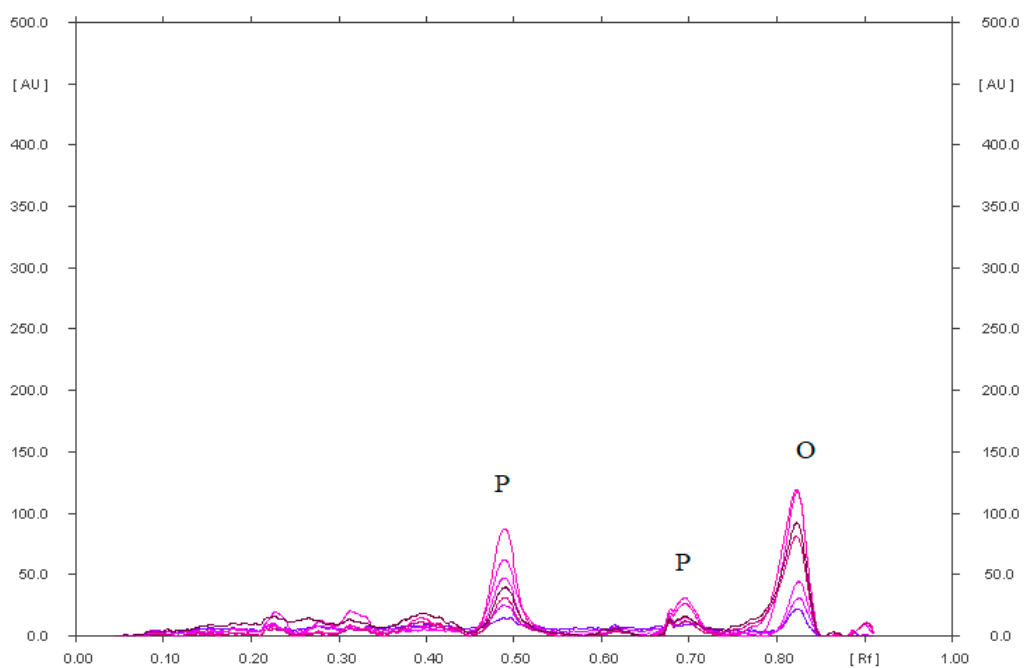

**Figure S9.** Densitogram of omeprazole solution in methanol, which after UV irradiation was separated on silica gel using the mobile phase: chloroform+methanol+ammonia (36:4:0.60, v/v/v); where: O-omeprazole and P1, P2, P3 - unidentified omeprazole degradation products.

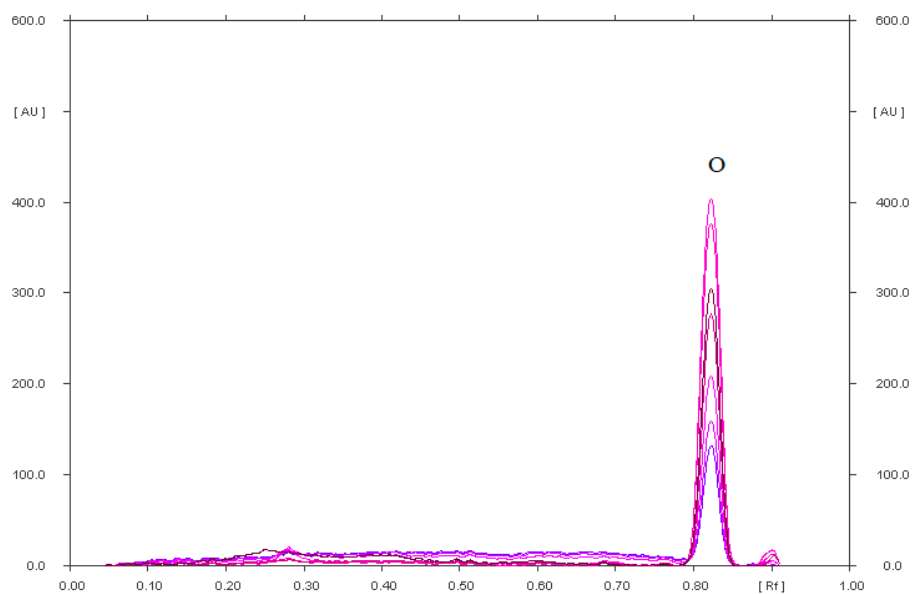

**Figure S10.** Densitogram of omeprazole derived from an extract of Omeprazole Genoptim SPH, which was analyzed on silica gel using the mobile phase: chloroform+methanol ammonia (36:4:0.60, v/v/v).

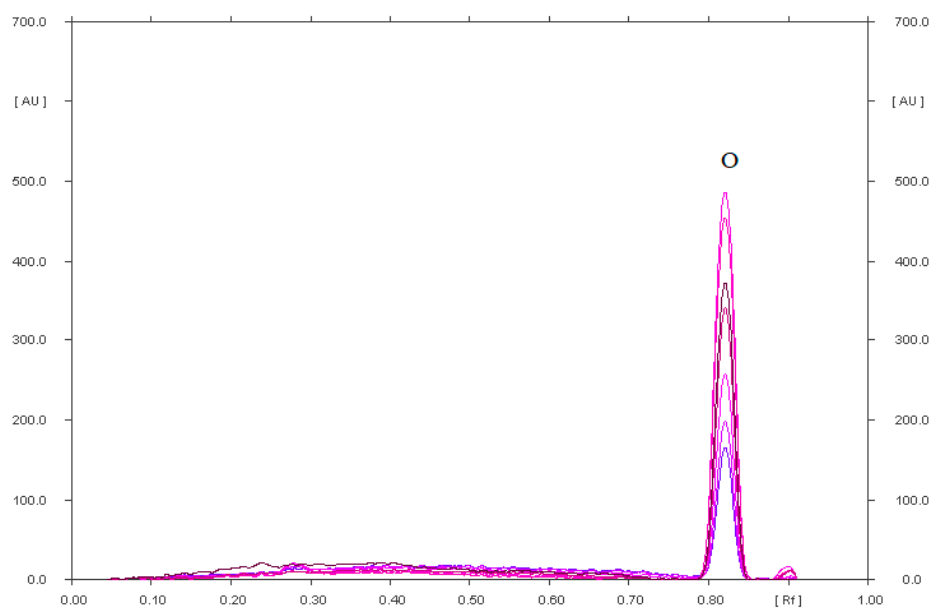

**Figure S11.** Densitogram of omeprazole standard, which was analyzed on silica gel using the mobile phase: chloroform+methanol+ammonia (36:4:0.60, v/v/v).

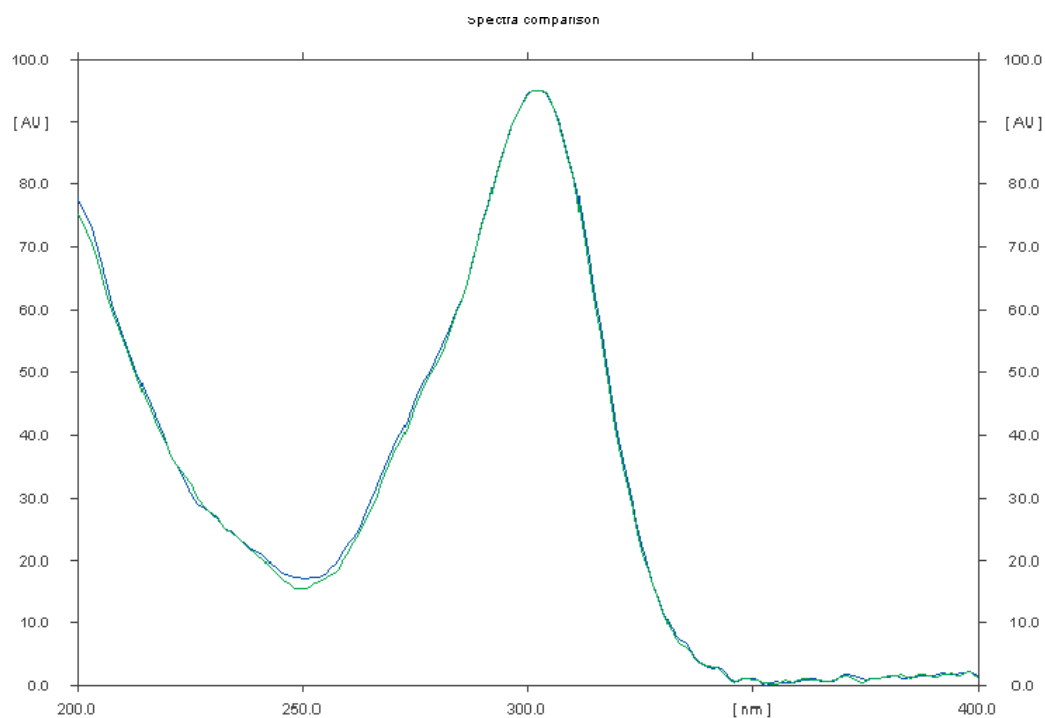

**Figure S12.** Comparison of the spectrodensitograms of the omeprazole standard and omeprazole from the DicloDuo Combi combined preparation.

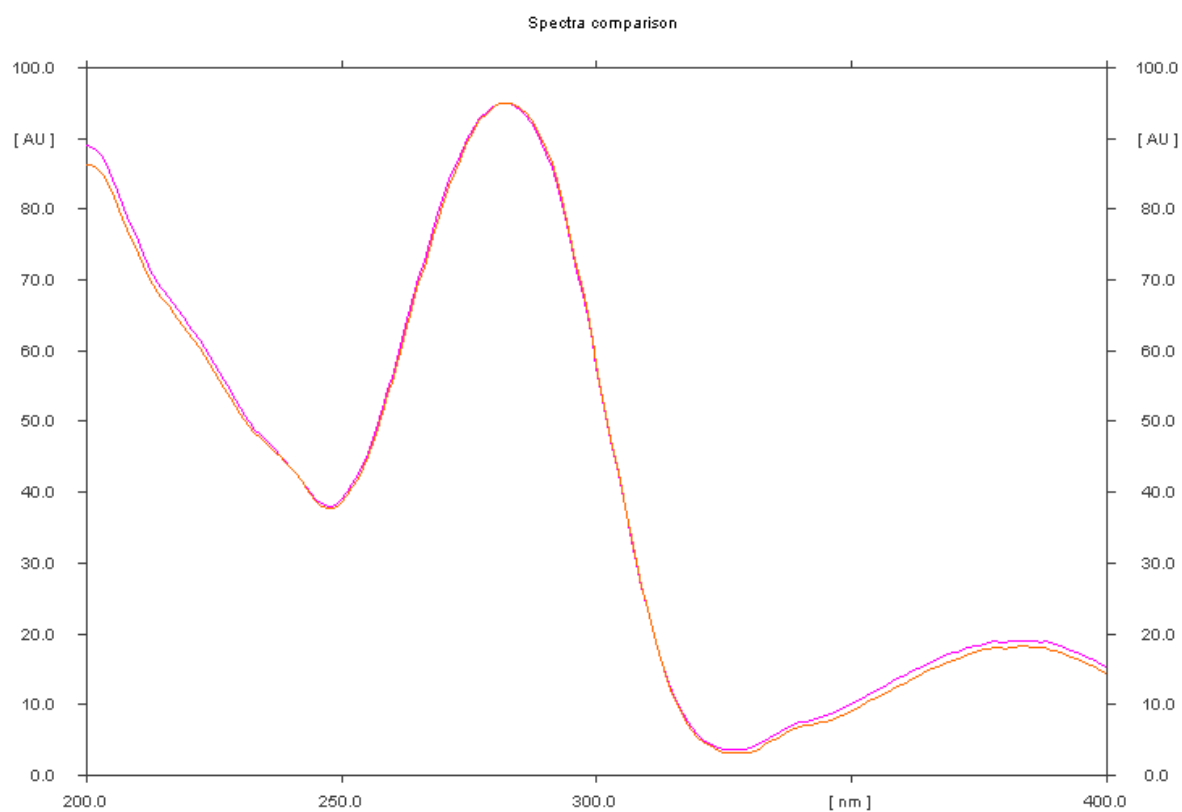

**Figure S13.** Comparison of the spectrodensitograms of the diclofenac standard and diclofenac from the DicloDuo Combi combined preparation.

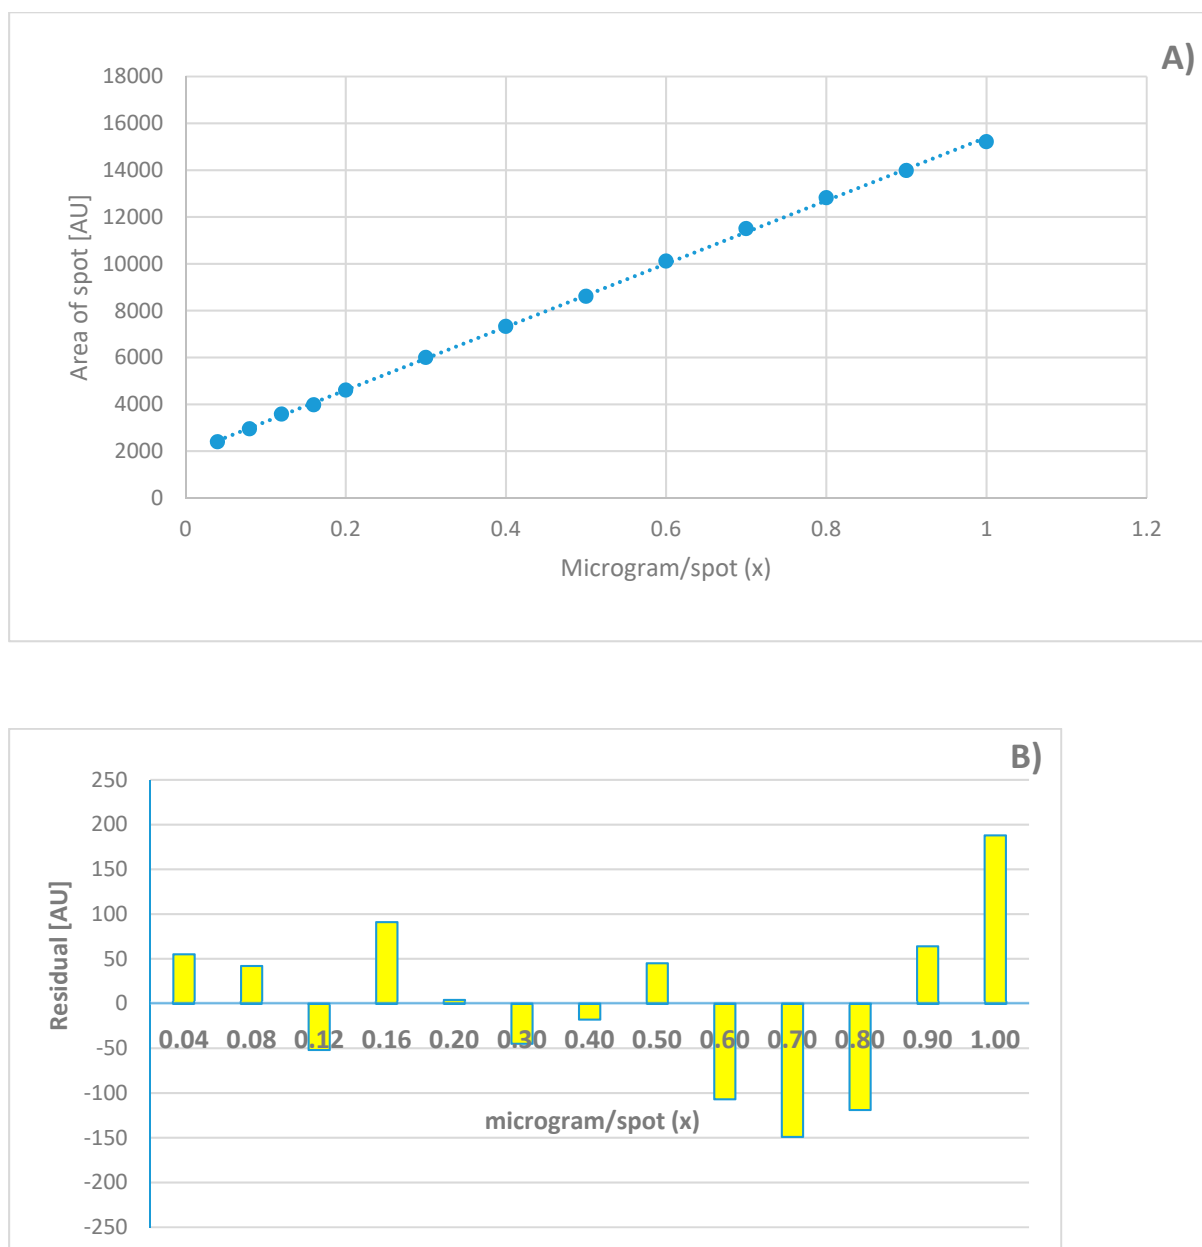

**Figure S14.** Calibration plot (A) and plot of residuals (B) for omeprazole in the linear working range (mobile phase: chloroform+methanol+ammonia 36:4:0.60, v/v/v).



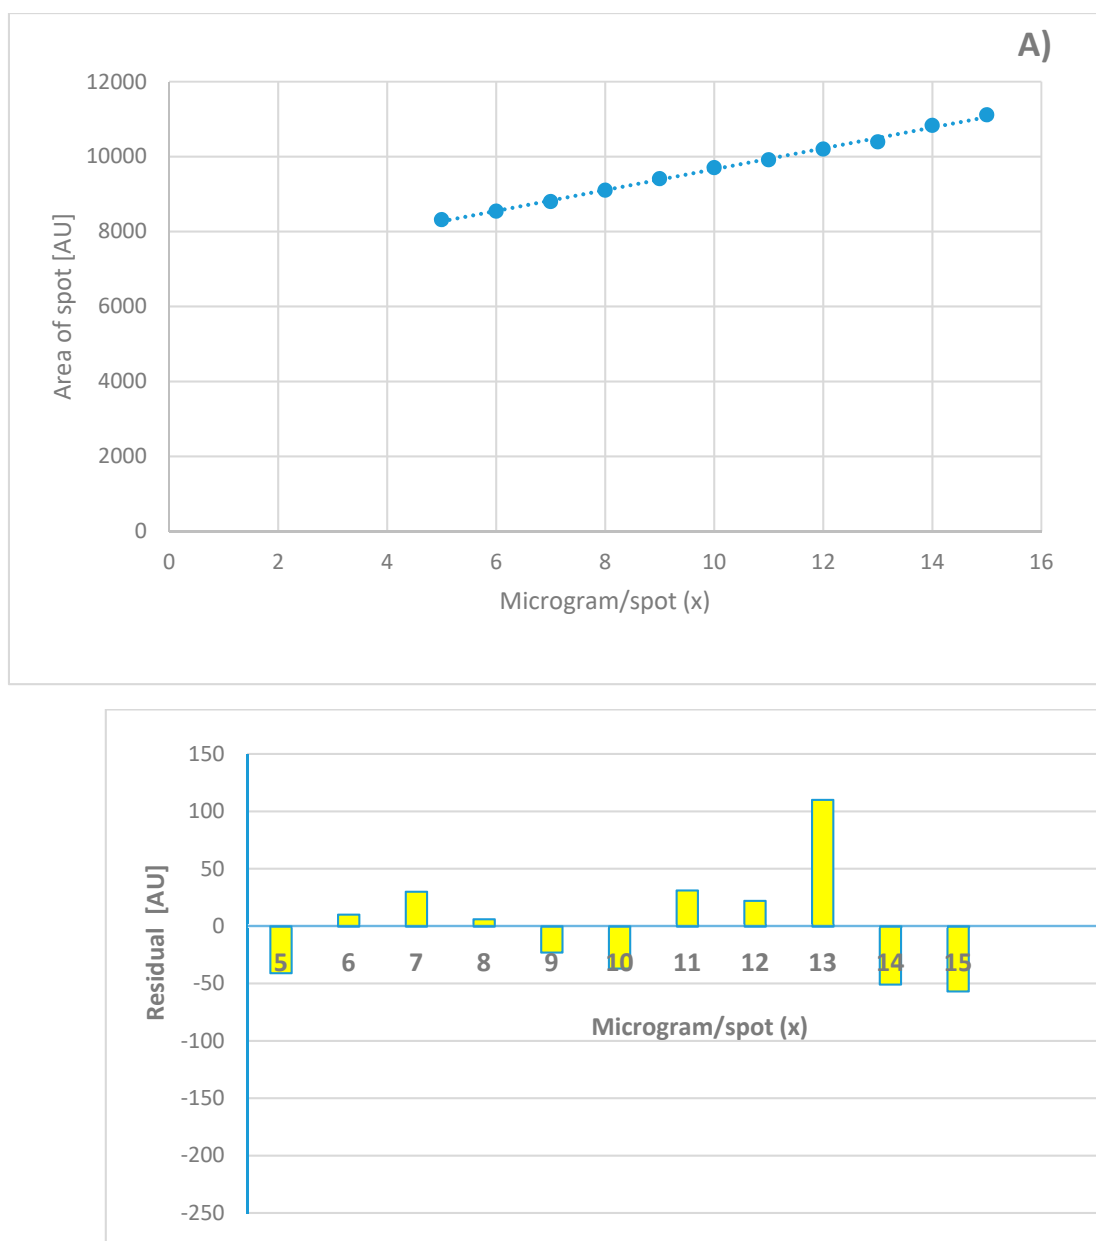

**Figure S15.** Calibration plot (A) and plot of residuals (B) for diclofenac sodium in the linear working range after 2D bidirectional development of the chromatography plate (first mobile phase: chloroform +methanol+ammonia (36:4:0.60, v/v/v); second mobile phase: cyclohexane+chloroform+methanol+ glacial acetic acid 6:3:0.5:0.5 v/v/v/v).

Table S1. The relative percentage error in the determination of the area of the chromatographic band of omeprazole and diclofenac sodium, respectively.

| Omeprazole                         |                                                                                            | Diclofenac sodium                  |                                                                                            |
|------------------------------------|--------------------------------------------------------------------------------------------|------------------------------------|--------------------------------------------------------------------------------------------|
| Analyte concentration<br>[µg/spot] | The relative percentage error in the determination of the area of the chromatographic band | Analyte concentration<br>[µg/spot] | the relative percentage error in the determination of the area of the chromatographic band |
| 1                                  | -1.24%                                                                                     | 15                                 | 0.51%                                                                                      |
| 0.9                                | -0.46%                                                                                     | 14                                 | 0.48%                                                                                      |
| 0.8                                | 0.93%                                                                                      | 13                                 | -1.06%                                                                                     |
| 0.7                                | 1.30%                                                                                      | 12                                 | -0.21%                                                                                     |
| 0.6                                | 1.06%                                                                                      | 11                                 | -0.32%                                                                                     |
| 0.5                                | -0.52%                                                                                     | 10                                 | 0.38%                                                                                      |
| 0.4                                | 0.25%                                                                                      | 9                                  | 0.25%                                                                                      |
| 0.3                                | 0.76%                                                                                      | 8                                  | -0.07%                                                                                     |
| 0.2                                | -0.08%                                                                                     | 7                                  | -0.34%                                                                                     |
| 0.16                               | -2.29%                                                                                     | 6                                  | -0.11%                                                                                     |
| 0.12                               | 1.45%                                                                                      | 5                                  | 0.49%                                                                                      |
| 0.08                               | -1.41%                                                                                     |                                    |                                                                                            |
| 0.04                               | -2.30%                                                                                     |                                    |                                                                                            |
